1 **Title:** Quantitative dissection of color patterning in the foliar ornamental *Coleus* reveals  
2 underlying features driving aesthetic value

3  
4 **Running Title:** Quantitative dissection of color patterning

5  
6  
7 Authors: Mao Li<sup>1</sup> (mli@danforthcenter.org), Viktoriya Coneva<sup>1,2</sup> (viktoriya.coneva@gmail.com), David Clark<sup>3</sup>  
8 (geranium@ufl.edu), Dan Chitwood<sup>4</sup> (chitwoo9@msu.edu), Margaret Frank<sup>1,5,\*</sup> (mhf47@cornell.edu)

9  
10 <sup>1</sup>Donald Danforth Plant Science Center, Saint Louis, MO 63132

11 <sup>2</sup>Current address: Centro de Tecnologia Canavieira US Headquarters, Saint Louis, MO 63132

12 <sup>3</sup>University of Florida, Department of Environmental Horticulture, Gainesville, FL 32611-0670.

13 <sup>4</sup>Current address: Michigan State University, Department of Horticulture and Department of Computational  
14 Mathematics, East Lansing, MI 48824.

15 <sup>5</sup>Current address: Cornell University, School of Integrative Plant Science, Ithaca, NY 14853.

16 \*Corresponding Author: Margaret Frank (mhf47@cornell.edu)

17  
18

19

20

21

22

23

24

25

26

27

28

29

30

31

32

33

34

35

36

37

38

39

40

41

42

## 43 Summary

44  
45  
46  
47  
48  
49  
50  
51  
52  
53  
54  
55  
56  
57  
58  
59  
60  
61  
62  
63  
64  
65  
66  
67  
68  
69  
70  
71  
72  
73  
74  
75  
76  
77  
78  
79  
80  
81  
82  
83  
84  
85  
86  
87  
88

- Coleus is a popular ornamental plant that exhibits a diverse array of foliar color patterns. New cultivars are currently hand selected by both amateur and experienced plant breeders. In this study, we reimagine coleus breeding using a quantitative color analysis framework.
- Despite impressive advances in high-throughput data collection and processing, complex color patterns remain challenging to extract from image datasets. Using a new phenotyping approach called “ColourQuant,” we extract and analyze pigmentation patterns from one of the largest coleus breeding populations in the world.
- Working with this massive dataset, we are able to analyze quantitative relationships between maternal plants and their progeny, identify features that underlie breeder-selections, and collect and compare consumer input on trait preferences.
- This study is one of the most comprehensive explorations into complex color patterning in plant biology and provides new insights and tools for exploring the color pallet of the plant kingdom.

Key words: High-throughput phenotyping, ornamental plant breeding, color patterning, foliar phenotypes, Coleus, color analysis.

## 89 Introduction

90

91 *Coleus* (*Coleus scutellarioides*) is a common ornamental bedding plant that is bred for  
92 its brilliant and diverse foliar color patterning (Bailey, 1924; Pedley & Pedley, 1974;  
93 Paton *et al.*, 2018, 2019). Wild relatives in the *Coleus* genus harbor a small degree of  
94 variegated pigmentation that has been expanded into distinctive new cultivars that  
95 harbor complex variegation patterns through successive rounds of hybridization and  
96 selection (Suddee *et al.*, 2004). The prevalence of *Coleus* in gardens and urban  
97 landscapes around the world is a testament to the unique aesthetic capacity of this  
98 species (Rogers, 2008). With over 500 cultivars on the market, and new ones added  
99 each year, *coleus* represents one of the largest and most diverse examples of  
100 pigmentation patterning within a single species.

101

102 Advances in plant phenotyping have revolutionized how humans interact with botanical  
103 traits (Fahlgren *et al.*, 2015; Gehan & Kellogg, 2017; Gehan *et al.*, 2017; Li *et al.*,  
104 2018b; Prunet & Duncan, 2020; Amézquita *et al.*, 2020). High throughput data collection  
105 has enabled rapid agricultural trait selection (Singh *et al.*, 2019; Shakoor *et al.*, 2019;  
106 Ibba *et al.*, 2020), early detection and management of disease (Mutka & Bart, 2014;  
107 Shakoor *et al.*, 2017), and large-scale 2-dimensional morphological analyses (Li *et al.*,  
108 2018a). Penetrating high-resolution imaging technologies, such as X-ray CT and laser  
109 ablation tomography have also made complex, three-dimensional topologies accessible  
110 (Chitwood *et al.*, 2019; Li *et al.*, 2019b, 2020a; Prunet & Duncan, 2020; Amézquita *et*  
111 *al.*, 2020; Vanhees *et al.*, 2020). Despite these enormous advances, rapid phenotyping  
112 for complex color patterning remains a major hurdle in High Throughput (HTP) analysis.  
113 Indeed, the majority of color phenotypes expressed in plants are typically uniformly  
114 expressed (for example, monochromatic leaves (Gehan *et al.*, 2017) and berries  
115 (Underhill *et al.*, 2020)), un-patterned in their expression (for example, lesions (Arnal  
116 Barbedo, 2013; Gobalakrishnan *et al.*, 2020; Xie *et al.*, 2020)), or have highly  
117 predictable patterns (for example, nectar guides). These color phenotypes are readily  
118 extractable using existing image processing approaches that are not suited for the  
119 complex suite of color patterns represented in our *coleus* population (Arnal Barbedo,  
120 2013; Gobalakrishnan *et al.*, 2020; Xie *et al.*, 2020)). Here, we address the need for

121 enhanced tools to extract and analyze complex patterns. In this study, we map out  
122 pigmentation values as three-dimensional point clouds in Lab color space, extract the  
123 continuous distribution of color using Gaussian density estimation (Li *et al.*, 2019a),  
124 dissect color patterns based on pigmentation position on two dimensional leaves,  
125 quantify bilateral symmetry for shape and color, and separate shape from color using  
126 thin plate spline deformation.

127  
128 Given the prominence of Coleus in the gardening marketplace, and the vast diversity of  
129 pigmentation patterns that are exhibited within Coleus breeding populations, Coleus as  
130 a breeding system serves as an ideal platform for testing this new, quantitative  
131 approach for HTP color phenotyping. In this study, we develop a pipeline to extract  
132 quantitative descriptors for foliar pigmentation patterns from one of the largest Coleus  
133 breeding populations in the world ( $n > 32,800$  plants). We are able to extract the  
134 distribution of all existing pigmentation patterns presented within this massive breeding  
135 population, quantify maternal plant-progeny pigmentation relationships, and identify  
136 aesthetic features that are associated with increased value from the perspective of the  
137 breeder as well as the general public. This work is built on a powerful study system, and  
138 provides a new framework for approaching complex color phenotyping. This work has  
139 direct implications for investigating color features in both ornamental plant breeding and  
140 ecological systems, where pigmentation patterns play an important role in influencing  
141 how plants interact with humans, pollinators, and herbivores.

142

## 143 **Methods**

144

### 145 **Coleus population, sampling, and image processing**

146

147 We collected and sowed 50,000 Coleus seeds from 133 open-pollinated mother plants  
148 in early January, 2015 in Gainesville, FL. We organized the seedlings into families  
149 based on their maternal parents, grew the plants for five weeks and then selected  
150 ~2,000 individuals as potential new cultivars based on their foliar color patterning and  
151 branching architecture in mid-February. Next, we harvested the youngest fully

152 expanded leaf from each plant between 5-6 weeks of age, and imaged the leaves on  
153 Epson Perfection V550 Scanners with Kodak KOCSGS color separation guides  
154 included for color calibration (Supplemental Fig 1; data available here: Zenodo.org  
155 10.5281/zenodo.4421754). We performed color analysis using our open-access  
156 software program called ColourQuant (Li *et al.*, 2019a); software available on github:  
157 github.com/maoli0923/ColourQuant). Briefly, we adjusted the RGB color balance on  
158 each scan by a white balance method so that the white swatch in the Kodak KOCSGS  
159 color separation guide is pure white, to ensure that scanners were not biasing the color  
160 data. Next, we segmented the leaves from the background by converting the RGB  
161 matrix into hue-saturation-value (HSV) format. Since most background pixels are grey in  
162 HSV, this was used to set a threshold (e.g.  $S > 0.15$ ) that separates grey values from true  
163 leaf values. We then used the binary leaf silhouettes to extract the leaf color data by  
164 setting the background to pure white. We manually adjusted the thresholding for leaves  
165 that could not be automatically extracted due to shadows in the scan, and removed  
166 outliers from the sample set, including leaves that were overlapping on the scanner,  
167 very small, or broken.

168

### 169 **Color pattern analysis**

170

171 To extract quantitative color distribution information, we converted the leaf color  
172 matrices from RGB to CIELAB ( $L^*a^*b^*$ ) color, which is a continuous color space that  
173 consists of three descriptors:  $L^*$  = “lightness,”  $a^*$  = “green to magenta,” and  $b^*$  = “blue to  
174 yellow.” We studied the distribution of mean and variance for  $L^*$ ,  $a^*$ ,  $b^*$  color values  
175 across the leaves by first calculating the average value and variance of  $L^*$ ,  $a^*$ , and  $b^*$  for  
176 each leaf (i.e. “mean  $L^*$ ,” “mean  $a^*$ ,” “mean  $b^*$ ,” “variance of  $L^*$ ,” “variance of  $a^*$ ,” and  
177 “variance of  $b^*$ ”), and then plotting histograms and boxplots to show the overall mean  
178 and variance distributions for all leaves in the breeding population. Next, we treated the  
179 3D Lab color matrices as 3D point clouds, which enabled us to extract color distribution  
180 and frequency information for each leaf.

181

182 The mean and variance of Lab values roughly describes the color for each leaf.  
183 However, in order to compare the distribution and frequency of Lab values across the  
184 leaves, we applied a Gaussian density estimator (GDE) to the Lab point cloud. GDE is  
185 a function defined on 3D space, providing a robust and direct density estimate from the  
186 point cloud data. To reduce computational complexity, we restricted the domain of the  
187 GDE function to a fixed bounded cuboid. The GDE descriptor alone captures statistical  
188 color frequency, not spatial patterning. To capture spatial color information, we  
189 segmented the leaves into distinct zones based on normalized pixel distances: “border”  
190 – defined as the outer 15% of pixels from the leaf boundary to the centroid, “center” –  
191 defined as the inner 75% of pixels from the centroid to the boundary, and “full” – defined  
192 as the entire color matrix. The distance between any two leaflets is calculated with the  
193 following equation:

194

$$195 \quad D = \sqrt{d_{full}^2 + d_{border}^2 + d_{center}^2}$$

196

197 where  $d$  represents the  $L_2$  distance between GDE functions for each corresponding  
198 zone. With this calculation, the pattern difference between two leaves is determined by  
199 their degree of similarity across all three zones. For pairwise distances, we used  
200 multidimensional scaling (MDS, similar to a PCA) to project the data in a lower  
201 dimensional space, which allows us to capture the major features that contribute to  
202 pattern variation. These methods and the supporting software for this approach can also  
203 be found in the publication by (Li *et al.*, 2019a)  
204 (<https://github.com/maoli0923/ColourQuant>).

205

206 To quantify the degree of mirror symmetry for each leaf, we first marked a bilaterally  
207 symmetric line by placing two landmarks, one at the proximal point (petiole) and another  
208 at the distal point (leaf tip). These landmarks were then used to partition the leaf into  
209 longitudinal halves that could be directly compared to one another. We used two  
210 methods for quantifying mirror symmetry. First, we performed a general measure by  
211 comparing the differences in left and right color distributions (using GDE functions), and

212 second, we measured the degree of bilateral shape symmetry by overlaying the left and  
213 right halves of the leaf and computing the percentage of pixels that fail to overlap.  
214 Notably, smaller values reflect a lower degree of asymmetry.

215

### 216 **Quantitative analysis of maternal-offspring pigmentation relationships**

217

218 To calculate the phenotypic distance between maternal plants and their progeny, we  
219 divided the distance between each maternal leaf and the leaves of its progeny by the  
220 distance between the maternal leaf and all of the leaves in the breeding population. To  
221 investigate how maternal color and color complexity influence these color traits in the  
222 progeny population, we calculated the mean and variance of  $L^*$ ,  $a^*$ , and  $b^*$  for the  
223 maternal leaves and their offspring and then computed the variance of those traits  
224 across the offspring within each family (e.g. named as “variance of family mean  $L$ ”, and  
225 “variance of family  $L$  variance”).

226

### 227 **Quantifying aesthetic features of selected plants**

228

229 We calculated the influence of breeder selection on color and shape symmetry, as well  
230 as pigmentation  $L^*$ ,  $a^*$ , and  $b^*$  values, by comparing the probability distribution for each  
231 value in the entire breeding population with the probability distribution in the selected  
232 population. Two sample T-tests accounting for uneven sample sizes were used to  
233 calculate the significance of selection on each color parameter.

234

### 235 **Public preferences for coleus colors independent of shape**

236

237 To investigate color preferences amongst the general public, we created a survey  
238 based on the major sources of variation for leaf color patterning. First, we separated  
239 shape from color patterning by deforming the leaves into uniform circles using thin-  
240 plate-spline (TPS) interpolation, followed by centering and normalizing the circles into  
241 the same position and size. Next, we rotated each circularized leaf so that the first  
242 landmark (near the base) is on the negative half of the  $y$  axis ( $x=0$ ) and the tip is on the

243 positive half . We resized each circular leaf image to be 70x70 dimension and reshaped  
244 the pixel L\*a\*b\* colors into a long (12150 dimension) vector. To calculate the main  
245 sources of variance, we performed a principal component analysis on the long vectors  
246 of the circularized leaves and created a survey using google forms where public  
247 volunteers were asked to select their preference of eigencolors for the top 8 principal  
248 components (PCs). For kth PC, the eigencolors are represented by  $\pm x$  standard  
249 deviation along PC axis, where  $x=3+(k-1)*0.5$ , this produced more distinct color variants  
250 for the survey participants . We distributed the survey using a dedicated Twitter account  
251 (@ColeusColours), and then plotted the responses from all of the survey participants  
252 (N=172) and reconstructed the composite preferred leaf based on the responses.

253

254

## 255 **Results**

256

### 257 **New coleus breeding population**

258

259 Coleus is one of the most diverse species with regards to leaf pigmentation patterning in  
260 the world. Brilliant new coleus cultivars harboring novel leaf color and shape  
261 phenotypes can be generated using a recurrent mass selection approach. In this study,  
262 we took advantage of a very large coleus breeding population in order to explore the full  
263 spectrum of possible pigmentation patterns and their influence on breeding processes.  
264 We used 133 open-pollinated elite coleus lines that exhibit a wide range of existing color  
265 and shape phenotypes (Fig 1A-B) to generate a large population that harbors novel  
266 pigmentation combinations. To capture these new combinations, we planted over  
267 32,000 F1 progeny, and imaged their leaves on high-resolution color scanners  
268 (supplemental Fig S1). Color data are typically recorded as a composite of discrete  
269 Red, Green, and Blue (RGB) values that range from 0-255. We transformed our RGB  
270 data into the continuous Lab color space, which we then treated as a three-dimensional  
271 point cloud and extracted quantitative pigmentation data using a Gaussian density  
272 estimator (GDE) function (Fig 1C). A GDE function is a smoothed version of a  
273 histogram; it estimates data density by summing all of the normal distributions, which



274 are placed on each data point. Higher values are produced from regions with more data  
275 points, while lower values are produced from regions with sparse and/or noisy data,  
276 thus making the function robust.

277  
278 To visualize the CIELAB ( $L^*a^*b^*$ ) color space within our breeding population, we plotted  
279 the mean values of  $L^*$  (lightness),  $a^*$  (green-to-magenta), and  $b^*$  (blue-to-yellow) that  
280 were extracted from each leaf. The majority of leaves within the population skewed  
281 towards darker (lower) mean  $L$  values (Fig 2A). Mean values for  $a^*$  spanned from  
282 magenta-to-green, but were more heavily concentrated towards the magenta/maroon  
283 half of the range (Fig 2B), and mean values for  $b^*$  were almost exclusively in the  
284 positive range, and were strongly concentrated towards yellow rather than blue values  
285 (Fig 2C). While this approach provides an estimate of mean color distributions, it fails to  
286 capture color patterning within the population (Fig S2). There are three discrete regions  
287 that can be used to generally describe that vast majority of variegation patterns in  
288 coleus: the area surrounding the veins, the leaf border, and the leaf center. We applied  
289 a Gaussian density estimator function to 3-dimensional point clouds of the border (15%  
290 of pixels from the leaf boundary) and center (75% of the pixels from the centroid)  
291 regions of the leaf (Fig 1C). Venation varies considerably from leaf-to-leaf, and thus it is  
292 challenging to consistently extract this value from a large population, so we did not  
293 consider the contribution of variegated venation for this study. Our isolated border and  
294 center regions differed significantly from the full variance of  $L^*a^*b^*$  values ( $P$  ranged  
295 from  $7.75 \times 10^{-4}$  to  $< 2.23 \times 10^{-308}$ ), indicating that these regions exhibit distinct color  
296 patterns (Fig 2D). Multidimensional scaling (MDS) can be used to extract the main  
297 sources of variance within complex datasets. To investigate the variance in color  
298 patterning within our population, we generated MDS plots from the GDE function  
299 distance for the full leaf (Supplemental Fig S3A), border (Supplemental Fig S3B), center  
300 (Supplemental Fig S3C), and composite full leaf plus border plus center distance (Fig  
301 2E-H). We have superimposed example leaves on top of the plot to illustrate the major  
302 color differences that are represented within the population (Fig 2F, H, and S3).

303

304 The sub-sample border and center plots provided poor separation of the major pattern  
305 classes within the population (Supplemental Fig S3B-C). For example, green bordered  
306 leaves with maroon centers are distributed in multiple locations across the border and  
307 center MDS plots (Supplemental Fig S3B-C). The full leaf plot performed much better  
308 with regard to pattern separation compared to the sub-sample plots; however, it still  
309 failed to produce distinct groupings for detailed pattern differences. For instance, pink  
310 and maroon center variegation patterns are intermixed with solid maroon leaves in all 4  
311 dimensions of the full leaf MDS (Fig S3A). The composite plot, on the other hand,  
312 accounts for both global and isolated center and border pigmentation values, and thus  
313 was able to resolve distinct pattern groupings (Fig 2E-H). The first dimension clearly  
314 separates the population along the green-to-magenta divide (the  $a^*$  value of the  $L^*a^*b^*$   
315 color space), while the second dimension separates the population from darker  
316 (towards the bottom) to lighter  $L^*$  pixel distributions (Fig 2F). In the third and fourth  
317 dimensions, five major patterns are resolved: solid orange in the upper right, solid deep  
318 purple in the upper left, solid green in the lower left, solid maroon in the lower right, and  
319 several sub-populations of variegated patterns in the lower left and center (Fig 2H). In  
320 the lower left corner of MD 3 and MD 4, we were able to resolve most of the variegated  
321 patterns into subpopulations based on center and border features, for example wide  
322 maroon centers with thin green borders, light pink centers with green, maroon, or  
323 orange borders, yellow/white centers with green borders, and even deep purple  
324 venation on green leaves. There are, however, two pigmentation patterns that we failed  
325 to isolate in our composite plot. First, are leaves that have both relatively small central  
326 pigmentation regions and low contrast between the border and center colors, and  
327 second, are leaves with random green and purple sectors whose patterns were most  
328 likely generated by active transposons (Tilney-Bassett & Others, 1986; Frank &  
329 Chitwood, 2016). Overall, this composite MDS approach performed very well with  
330 regard to separating the population into major pattern groups.

331

332 **Maternal phenotypes influence the phenotypic distance of their progeny**

333

334 The vast majority of brilliant new coleus color patterns result from the spatially regulated  
335 production of anthocyanin (purple and pink pigments) and loss of chlorophyll (white and  
336 yellow pigments). Classic genetic analyses indicate that purple pigmentation is  
337 controlled by a single dominant allele, while loss of chlorophyll pigmentation resulting in  
338 yellow/albino phenotypes results from a recessive allele (Boye & Rife, 1938; Rife,  
339 1948). These studies were carried out in simplified phenotypic and genetic  
340 backgrounds; however, they provide a basic framework for interpreting the color  
341 relationships within our large breeding population. To address patterning relationships  
342 within our population of 32,000+ individuals, we quantified the relative distance between  
343 maternal plants and their progeny and visualized it in multidimensional scaling (MDS)  
344 space (Fig 3). It is important for us to note that our population was generated using an  
345 uncontrolled, open-pollination design; honeybee hives were brought into the field to  
346 ensure pollination and promote outcrossing amongst the maternal plants. In our field  
347 setting, it is impossible to track the male half of the parental equation without the  
348 developing genotype-specific molecular markers, so we are only analyzing maternal-to-  
349 progeny relationships. Another limitation that we cannot exclude from this experimental  
350 design is the potential bias that leaf patterning can have on pollinator behavior, and  
351 while we cannot assume true random mating within this context, we have reason to  
352 believe that pollination behavior is close to random based on the fact that coleus flowers  
353 tend to be highly conserved with respect to their morphology and color. Thus, they are  
354 likely equally attractive to our honey bee pollinators.

355  
356 We identified a few clear trends from our mother-child analysis. First, brighter maternal  
357 plants (high  $L^*$ ) tend to produce progeny with a greater variance of pixel brightness (Fig.  
358 S4A). This is exemplified by the progeny in families 79 and 43. We also observed that  
359 green maternal plants (low  $a^*$ ) tend to produce progeny that exhibit a large variance  
360 between green and magenta (Fig. S4B, for example, the progeny in families 43 and 94).  
361 This is logical, given that purple and magenta pigments have been linked to dominant  
362 alleles, and thus would be expressed in F1 crosses with purple/magenta pollen donors.  
363 Along similar lines, yellow maternal plants (high  $b^*$ ) tend to produce progeny that  
364 express a large variance in the yellow-to-blue color range (Fig. S4C, for example the

365 progeny in families 79 and 29). Again, this follows the logic that yellow pigmentation is a  
366 recessive trait, and thus color patterning in the F1 generation is more likely to exhibit  
367 paternal phenotypes. We found that maternal plants with complex color patterning (high  
368 variance of  $L^*$ ,  $a^*$ , or  $b^*$ ) tend to produce progeny with larger variance in their complexity  
369 (Fig. S4D-F, for example the progeny in families 22 and 23), which results in more  
370 diverse color patterns. Surprisingly, we only saw a minor trend for green versus purple  
371 maternal plants being closer versus farther away (respectively) from their progeny in  
372 phenotypic space. The majority of green leafed maternal plants fall on the top half of the  
373 phenotypic distance plot (e.g. smaller distance, for example, the progeny in families 63,  
374 43, 94, 79, and 15), while purple maternal plants are distributed across the phenotypic  
375 spectrum (Fig 3).

376

377

### 378 **Bilateral symmetry for color and shape are strongly correlated with the selection** 379 **of new cultivars**

380

381 New coleus cultivars are hand selected based on the visual identification of target traits,  
382 through a process that is frequently referred to as selection via “the breeder’s eye”  
383 (Fasoula *et al.*, 2019). Our experienced coleus breeder identified approximately 2,000  
384 selected lines from the population to carry forward for potential cultivar development. A  
385 long-standing theory posits that symmetry is positively correlated with aesthetic value  
386 (Birkhoff, 1933). To investigate the influence of color and shape symmetry on our  
387 breeding process, we tested whether our selected population deviated significantly from  
388 the total population with regard to color and shape symmetry, as well as mean Lab  
389 distributions (Fig 4).

390

391 To quantify the degree of mirror symmetry within leaves from the selected versus total  
392 population we manually partitioned every leaf into left and right halves by drawing a line  
393 from the tip to the base of the leaf. We then quantified color asymmetry by comparing  
394 the Lab Gaussian distributions between the left and right halves (Fig 4A), and shape  
395 symmetry by folding binary leaf silhouettes along the midline and calculating the

396 percentage of non-overlapped pixels (Fig 4B). Our two sample T-tests between the  
397 selected and total population showed very strong statistical support for both color and  
398 shape symmetry playing a significant role in influencing the selection process (p-value  
399  $9.72e-05$  for increased color symmetry, and  $p\text{-value}=6.01e-51$  for increased shape  
400 symmetry in the selected population; Fig 4C).

401  
402 To determine if specific color features correlated with cultivar selection, we tested  
403 whether the selected pool differed from the total population with regard to independent  
404 components of the Lab color space (Fig 4D). Interestingly, the selected pool deviated  
405 significantly from the full population with regard to both the mean and variance for each  
406 of the three Lab color components (Fig 4D). Comparative plots of mean Lab space for  
407 the total population (in gray) and selected pool (in red) clearly show that the source of  
408 divergence between these two populations comes from an accentuated bimodal  
409 distribution on either end of the spectra within the selected pool, indicating that the  
410 breeder is selecting along the extremes of the color space. For example, within the L  
411 spectrum (the light-to-dark spectrum), the enriched bimodal distribution, reflects strong  
412 selection for both bright and dark (deep colored) pixel values (p-value for mean L =  
413  $7.99e-06$ ; Fig 4D). Furthermore, our analysis revealed significant divergence in the  
414 distribution of selected versus total population values for variance within the Lab space  
415 (p-values for L= $1.15e-45$ , a= $2.16e-187$ , b= $2.48e-44$ ). Again, graphs for the selected pool  
416 have strong bimodal distributions for all three Lab spectra indicating that there was  
417 selection for varieties with either high color contrast or uniform (solid color) patterning  
418 (Fig 4D). In contrast, the total population graphs are concentrated around a single mean  
419 peak (Fig 4D). Taken together, this analysis demonstrates how the “breeder’s eye”  
420 reshaped the selected pool to significantly enhance mirror symmetry for both color and  
421 shape, and concentrate the cultivars with either high color contrast or complete color  
422 uniformity. Notably, this analysis accounts for the first round of selection where a high  
423 level of variability concentrated around both commercial targets and novel aesthetic  
424 traits are maintained. Approximately 6-8 of the plants from this large selection pool are  
425 taken through the commercialization process.

426

427 **Public survey shows strong overlap between public preferences and breeder**  
428 **selection**

429  
430 Once we established the quantitative color structure for our breeding population, we  
431 explored how the existing coleus color space matched with public color preferences. To  
432 do this, we created a pilot survey that was openly distributed using a dedicated Twitter  
433 account (@ColeusColours). To avoid the confounding influence of leaf shape on color  
434 preference, we standardized the leaf orientation based on the bilateral symmetrical line  
435 and deformed our leaf shapes into circles using a thin plate spline interpolation (Fig 5A),  
436 this method smoothly transforms the border shape into a uniform edge with minor  
437 distortion of the internal color patterning. Next, we performed a principal component  
438 analysis with our circularized leaves (Fig 5B-C) and used the top principal components  
439 to construct our survey for color preference. Our survey presented 8 questions that  
440 asked the participants to select their preference from the mean and plus or minus a few  
441 standard deviations along PC axis (“eigencolors”) for each of the top 8 principal  
442 components (Fig 5D). We gathered data from 172 participants, plotted each of their  
443 preferences (Fig 5E), and then reconstructed the ideal leaf based on public preferences  
444 for the first eight eigencolors with weighted contributions based on the percent variance  
445 contained within each PC (Fig 5F). Our results show that participants have a strong  
446 preference for very green (responses to PC1 in Fig 5E), very magenta (responses to  
447 PC2 in Fig 5E), and leaves with either high contrast color patterns (responses to the  
448 contrasting standard deviation extremes in PC3-PC8). The resulting ideal leaf that was  
449 reconstructed from the survey data has a high contrast bright green border with internal  
450 magenta pigmentation and yellow base (Fig 5F). This ideal leaf not only matches an  
451 existing variegated pattern that was resolved in the lower left hand quadrant of MD 3  
452 and MD 4 in our original population analysis (Fig 2H), it is also consistent with the  
453 direction of breeding in our selected pool (Fig 4D). This result indicates that even with  
454 this small pilot survey, there is strong overlap between public preferences and new  
455 cultivar development.

456  
457 **Discussion**

458  
459 High-throughput phenotyping (HTP) has transformed our ability to select and optimize  
460 plant traits (Das *et al.*, 2015; Shakoor *et al.*, 2017; York, 2019; Liu *et al.*, 2020) .  
461 Relative to morphological and architectural phenotypes, approaches for collecting and  
462 analyzing color patterns in plants remain limited. Indeed, existing methods of HTP data  
463 analysis are not well-suited for the large suite of patterning phenotypes exhibited in  
464 ornamental plants, like Coleus. In this paper, we utilize a new approach to address the  
465 problem of complex color patterning in a large Coleus breeding population. We  
466 partitioned the 2-dimensional leaf into different zones based on morphology and  
467 transformed the color data into a continuous, three-dimensional color space, and  
468 applied a Gaussian density estimator to extract pixel patterning across space. Using this  
469 approach we were able to successfully resolve the major pigmentation patterns  
470 contained within one of the largest and most diverse color patterned breeding  
471 populations in the world. Historically, these patterns were discussed using qualitative  
472 descriptors. By extracting the quantitative features underlying this pattern space, we  
473 were able to mathematically analyze relationships between maternal plants and their  
474 progeny, identify how aesthetic preferences reshape the color properties of the breeding  
475 population, and independently address whether public preferences align with  
476 commercial breeding goals.

477  
478 Our maternal-offspring color analysis may be one of the first times that the inheritance  
479 of pigmentation traits has been analyzed through this quantitative lens. We identified  
480 quantitative connections between color variance in maternal plants and their offspring  
481 that have direct applications for ornamental breeding. For example, breeders looking to  
482 increase the range of brightness within their population can start with a brighter parental  
483 population; we show that brighter mothers produce offspring that express a wider  
484 variance of brightness. Those aiming to increase overall color variation would want to  
485 start with parental plants that exhibit complex color patterning, as these mothers  
486 produced offspring with the largest variance in terms of pixel complexity. In line with  
487 classic genetic studies for coleus that identified purple as a dominant trait and green  
488 and yellow as recessive, we found that mothers with pixel concentrations on the green

489 and yellow ends of the spectrum produced offspring that had wider color variation. In  
490 essence, recessive color palettes could be considered blank canvases for breeding new  
491 pattern variants.

492  
493 Our analysis of features associated with breeder selection supports long-held theories  
494 about aesthetic preferences in humans; aesthetic preference for bilateral symmetry  
495 (Birkhoff, 1933) is reflected in the breeding process, where we identified significant  
496 enrichment for bilateral color and shape symmetry. Moreover, we found that public  
497 preferences for leaves with high color contrast largely agrees with the independent  
498 selection process for breeding new cultivars. As mentioned previously, new coleus  
499 cultivars are currently sight-selected through a process that involves extensive  
500 screening by professional and amateur breeders. The strong quantitative agreement  
501 between well-established aesthetic preferences and the breeding process, opens the  
502 possibility for automating this first step of cultivar selection. It is not hard to imagine  
503 taking this a step further, transforming the cultivar selection process into a customized  
504 system. Simple surveys, like the Coleus Colours pilot survey conducted for this study,  
505 could help people identify their ideal patterns and automated population screening  
506 would match a novel cultivar from the breeding population with the customer. This  
507 reimagined breeding approach offers people the personalized experience of designing  
508 and naming their own, unique coleus cultivar.

509  
510 Pigmentation patterns have fascinated scientists for centuries. These visual cues direct  
511 plant-pollinator interactions (Leonard & Papaj, 2011; Whitney *et al.*, 2013), fend off  
512 herbivores (Lev-Yadun, 2017), and as shown in this study, influence aesthetic value in  
513 ornamentals. A simple, yet elegant model involving a reaction-diffusion based  
514 mechanism, was famously put forth by Alan Turing to explain the diversity of pattern  
515 formation in nature (Turing, 1953). Recent work in the genus *Mimulus* uncovered  
516 genetic regulators that fit this Turing-based model, and direct the patterning of nectar  
517 guides through a reaction-diffusion interaction between an activator (NEGAN) and its  
518 inhibitor (RTO) (Ding *et al.*, 2020). Beyond this specific result, significant progress  
519 towards mapping the underlying genetic mechanisms that regulate pigment deposition



520 has been made using diverse floral models. In these systems, an R2R3 Myb, bHLH,  
521 and WDR “MBW” transcriptional regulon has been identified as a central regulator for  
522 color patterning, controlling both orange carotenoid and purple/red anthocyanin  
523 deposition ([Sagawa et al. 2016](#); [Ludwig et al. 1989](#); [Albert et al. 2014](#)). In contrast to  
524 floral systems, relatively little is known about the genetics of color patterning in  
525 vegetative organs; however, current knowledge including genetic mapping of  
526 pigmentation variants for leaves, roots, and fruits (Albert *et al.*, 2015; Yan *et al.*, 2020;  
527 Xu *et al.*, 2020; Yu *et al.*, 2020) and ectopic expression of floral regulators in vegetative  
528 tissue (Albert *et al.*, 2020), indicates that the transcriptional MBW regulon is broadly  
529 involved in pigmentation patterning across diverse organs.

530  
531 Our coleus breeding population expresses a tremendous diversity of pattern  
532 combinations. Rife and Boye (1938) recognized the potential of this prized ornamental,  
533 and proposed using Coleus as a model to dissect genetic regulators for color patterning.  
534 This suggestion did not get much traction, and we still know relatively little about color  
535 patterning in this unique ornamental. After 80 years of stalled progress, a renewed  
536 focus on the genetic regulation of pigmentation production and patterning would not  
537 only advance ornamental breeding, it would push the limits of Turing’s reaction diffusion  
538 model, reaching to describe the truly complex pattern variants that have drawn  
539 admiration from scientists and gardeners alike.

540

## 541 **Acknowledgements**

542

543 We are grateful to the undergraduate researchers who assisted with data collection at  
544 the University of Florida, and to Joshua Tester for growing the plants. This work was  
545 funded by startup funds from the Donald Danforth Plant Science Center, and royalties  
546 from the UF Coleus Breeding Program. This project was also supported by the USDA  
547 National Institute of Food and Agriculture, and by Michigan State University  
548 AgBioResearch. MHF was supported by an NSF PGRP Postdoctoral Fellowship (IOS-  
549 1523668).

550

551 **Author Contributions:**

552

553 MHF, VC, and DHC designed the imaging pipeline, DC bred the Coleus population,  
554 MHF and VC collected the data, and ML developed and performed the HTP color  
555 analysis. All authors contributed to writing the manuscript.

556

557 **References:**

558 **Albert NW, Butelli E, Moss SMA, Piazza P, Waite CN, Schwinn KE, Davies KM,**  
559 **Martin C. 2020.** Discrete bHLH transcription factors play functionally overlapping roles  
560 in pigmentation patterning in flowers of *Antirrhinum majus*. *The New phytologist*.

561 **Albert NW, Griffiths AG, Cousins GR, Verry IM, Williams WM. 2015.** Anthocyanin  
562 leaf markings are regulated by a family of R2R3-MYB genes in the genus *T. trifolium*.  
563 *The New phytologist* **205**: 882–893.

564 **Amézquita EJ, Quigley MY, Ophelders T, Munch E, Chitwood DH. 2020.** The shape  
565 of things to come: Topological data analysis and biology, from molecules to organisms.  
566 *Developmental dynamics: an official publication of the American Association of*  
567 *Anatomists* **249**: 816–833.

568 **Arnal Barbedo JG. 2013.** Digital image processing techniques for detecting,  
569 quantifying and classifying plant diseases. *SpringerPlus* **2**: 660.

570 **Bailey LH. 1924.** *Manual of Cultivated Plants: A Flora for the Identification of the Most*  
571 *Common of the Most Common Or Significant Species of Plantsgrown in the Continental*  
572 *United States and Canada for Food*. Macmillan Publ.

573 **Birkhoff GD. 1933.** *Aesthetic measure*. Cambridge, Mass.

574 **Boye CL, Rife DC. 1938.** GENETIC STUDIES OF COLEUS I. *Journal of Heredity* **29**:  
575 55–60.

576 **Chitwood DH, Eithun M, Munch E, Ophelders T. 2019.** Topological Mapper for 3D  
577 Volumetric Images. In: *Mathematical Morphology and Its Applications to Signal and*  
578 *Image Processing*. Springer International Publishing, 84–95.

579 **Das A, Schneider H, Burrige J, Ascanio AKM, Wojciechowski T, Topp CN, Lynch**  
580 **JP, Weitz JS, Bucksch A. 2015.** Digital imaging of root traits (DIRT): a high-throughput  
581 computing and collaboration platform for field-based root phenomics. *Plant methods* **11**:  
582 51.

583 **Ding B, Patterson EL, Holalu SV, Li J, Johnson GA, Stanley LE, Greenlee AB,**  
584 **Peng F, Bradshaw HD Jr, Blinov ML, et al. 2020.** Two MYB Proteins in a Self-

- 585 Organizing Activator-Inhibitor System Produce Spotted Pigmentation Patterns. *Current*  
586 *biology: CB* **30**: 802–814.e8.
- 587 **Fahlgren N, Gehan MA, Baxter I. 2015.** Lights, camera, action: high-throughput plant  
588 phenotyping is ready for a close-up. *Current opinion in plant biology* **24**: 93–99.
- 589 **Fasoula DA, Ioannides IM, Omirou M. 2019.** Phenotyping and Plant Breeding:  
590 Overcoming the Barriers. *Frontiers in plant science* **10**: 1713.
- 591 **Frank MH, Chitwood DH. 2016.** Plant chimeras: The good, the bad, and the ‘Bizzaria’.  
592 *Developmental biology* **419**: 41–53.
- 593 **Gehan MA, Fahlgren N, Abbasi A, Berry JC, Callen ST, Chavez L, Doust AN,**  
594 **Feldman MJ, Gilbert KB, Hodge JG, et al. 2017.** PlantCV v2: Image analysis software  
595 for high-throughput plant phenotyping. *PeerJ* **5**: e4088.
- 596 **Gehan MA, Kellogg EA. 2017.** High-throughput phenotyping. *American journal of*  
597 *botany* **104**: 505–508.
- 598 **Gobalakrishnan N, Pradeep K, Raman CJ, Javid Ali L, Gopinath MP. 2020.** A  
599 Systematic Review on Image Processing and Machine Learning Techniques for  
600 Detecting Plant Diseases. *2020 International Conference on Communication and Signal*  
601 *Processing (ICCSP)*.
- 602 **Hsu C-C, Chen Y-Y, Tsai W-C, Chen W-H, Chen H-H. 2015.** Three R2R3-MYB  
603 transcription factors regulate distinct floral pigmentation patterning in *Phalaenopsis* spp.  
604 *Plant physiology* **168**: 175–191.
- 605 **Ibba MI, Crossa J, Montesinos-López OA, Montesinos-López A, Juliana P,**  
606 **Guzman C, Delorean E, Dreisigacker S, Poland J. 2020.** Genome-based prediction of  
607 multiple wheat quality traits in multiple years. *The plant genome* **11**: 3.
- 608 **Leonard AS, Papaj DR. 2011.** ‘X’ marks the spot: The possible benefits of nectar  
609 guides to bees and plants: Nectar guides and bumblebee foraging. *Functional ecology*  
610 **25**: 1293–1301.
- 611 **Lev-Yadun S. 2017.** Defensive animal and animal-action mimicry by plants. *Israel*  
612 *Journal of Plant Sciences*: 1–31.
- 613 **Li B-J, Zheng B-Q, Wang J-Y, Tsai W-C, Lu H-C, Zou L-H, Wan X, Zhang D-Y, Qiao**  
614 **H-J, Liu Z-J, et al. 2020b.** New insight into the molecular mechanism of colour  
615 differentiation among floral segments in orchids. *Communications biology* **3**: 89.
- 616 **Li M, An H, Angelovici R, Bagaza C, Batushansky A, Clark L, Coneva V, Donoghue**  
617 **MJ, Edwards E, Fajardo D, et al. 2018a.** Topological Data Analysis as a Morphometric  
618 Method: Using Persistent Homology to Demarcate a Leaf Morphospace. *Frontiers in*  
619 *plant science* **9**: 553.

- 620 **Li M, Frank MH, Coneva V, Mio W, Chitwood DH, Topp CN. 2018b.** The Persistent  
621 Homology Mathematical Framework Provides Enhanced Genotype-to-Phenotype  
622 Associations for Plant Morphology. *Plant physiology* **177**: 1382–1395.
- 623 **Li M, Frank MH, Migicovsky Z. 2019a.** ColourQuant: a high-throughput technique to  
624 extract and quantify colour phenotypes from plant images. *arXiv [q-bio.QM]*.
- 625 **Li M, Klein LL, Duncan KE, Jiang N, Chitwood DH, Londo JP, Miller AJ, Topp CN.**  
626 **2019b.** Characterizing 3D inflorescence architecture in grapevine using X-ray imaging  
627 and advanced morphometrics: implications for understanding cluster density. *Journal of*  
628 *experimental botany* **70**: 6261–6276.
- 629 **Li M, Shao M-R, Zeng D, Ju T, Kellogg EA, Topp CN. 2020a.** Comprehensive 3D  
630 phenotyping reveals continuous morphological variation across genetically diverse  
631 sorghum inflorescences. *The New phytologist* **226**: 1873–1885.
- 632 **Lin-Wang K, Bolitho K, Grafton K, Kortstee A, Karunairetnam S, McGhie TK,**  
633 **Espley RV, Hellens RP, Allan AC. 2010.** An R2R3 MYB transcription factor associated  
634 with regulation of the anthocyanin biosynthetic pathway in Rosaceae. *BMC plant biology*  
635 **10**: 50.
- 636 **Liu S, Barrow C, Hanlon MT, Lynch J, Bucksch A. 2020.** DIRT/3D: 3D phenotyping  
637 for maize (*Zea mays*) root architecture in the field. *bioRxiv*.
- 638 **Mutka AM, Bart RS. 2014.** Image-based phenotyping of plant disease symptoms.  
639 *Frontiers in plant science* **5**: 734.
- 640 **Paton A, Mwanyambo M, Culham A. 2018.** Phylogenetic study of *Plectranthus* ,  
641 *Coleus* and allies (Lamiaceae): taxonomy, distribution and medicinal use. *Botanical*  
642 *journal of the Linnean Society. Linnean Society of London* **188**: 355–376.
- 643 **Paton AJ, Mwanyambo M, Govaerts RHA, Smitha K, Suddee S, Phillipson PB,**  
644 **Wilson TC, Forster PI, Culham A. 2019.** Nomenclatural changes in *Coleus* and  
645 *Plectranthus* (Lamiaceae): a tale of more than two genera. *PhytoKeys* **129**: 1–158.
- 646 **Pedley R, Pedley K. 1974.** *Coleus: A guide to cultivation and identification*. J.  
647 Bartholomew.
- 648 **Prunet N, Duncan K. 2020.** Imaging flowers: a guide to current microscopy and  
649 tomography techniques to study flower development. *Journal of experimental botany*  
650 **71**: 2898–2909.
- 651 **Rife DC. 1948.** SIMPLY INHERITED VARIATIONS IN COLEUS: A Résumé. *The*  
652 *Journal of heredity* **39**: 85–91.
- 653 **Rogers R. 2008.** *Coleus: Rainbow foliage for containers and gardens*. Timber Press  
654 (OR).

- 655 **Sagawa JM, Stanley LE, LaFountain AM, Frank HA, Liu C, Yuan Y-W. 2016.** An  
656 R2R3-MYB transcription factor regulates carotenoid pigmentation in *Mimulus lewisii*  
657 flowers. *The New phytologist* **209**: 1049–1057.
- 658 **Shakoor N, Agnew E, Ziegler G, Lee S, Lizárraga C, Fahlgren N, Baxter I, Mockler**  
659 **TC. 2019.** Genomewide association study reveals transient loci underlying the genetic  
660 architecture of biomass accumulation under cold stress in Sorghum. *Cold Spring Harbor*  
661 *Laboratory*: 760025.
- 662 **Shakoor N, Lee S, Mockler TC. 2017.** High throughput phenotyping to accelerate crop  
663 breeding and monitoring of diseases in the field. *Current opinion in plant biology* **38**:  
664 184–192.
- 665 **Singh D, Wang X, Kumar U, Gao L, Noor M, Imtiaz M, Singh RP, Poland J. 2019.**  
666 High-Throughput Phenotyping Enabled Genetic Dissection of Crop Lodging in Wheat.  
667 *Frontiers in plant science* **10**: 394.
- 668 **Stanley LE, Ding B, Sun W, Mou F, Hill C, Chen S, Yuan Y-W.** A Tetratricopeptide  
669 Repeat Protein Regulates Carotenoid Biosynthesis and Chromoplast Development in  
670 Monkeyflowers (*Mimulus*).
- 671 **Suddee S, A. J. Paton, Parnell JAN. 2004.** A Taxonomic Revision of Tribe Ocimeae  
672 Dumort. (Lamiaceae) in Continental South East Asia II. Plectranthinae. *Kew bulletin /*  
673 *Royal Botanic Gardens* **59**: 379–414.
- 674 **Tilney-Bassett RAE, Others. 1986.** *Plant chimeras*. Edward Arnold (Publishers) Ltd.
- 675 **Turing AM. 1953.** The chemical basis of morphogenesis. 1953. *Bulletin of*  
676 *mathematical biology* **52**: 153–97; discussion 119–52.
- 677 **Underhill AN, Hirsch CD, Clark MD. 2020.** Evaluating and Mapping Grape Color Using  
678 Image-Based Phenotyping. *Plant Phenomics* **2020**.
- 679 **Vanhees DJ, Loades KW, Bengough AG, Mooney SJ, Lynch JP. 2020.** Root  
680 anatomical traits contribute to deeper rooting of maize under compacted field  
681 conditions. *Journal of experimental botany* **71**: 4243–4257.
- 682 **Whitney HM, Milne G, Rands SA, Vignolini S, Martin C, Glover BJ. 2013.** The  
683 influence of pigmentation patterning on bumblebee foraging from flowers of *Antirrhinum*  
684 *majus*. *Naturwissenschaften* **100**: 249–256.
- 685 **Xie X, Ma Y, Liu B, He J, Li S, Wang H. 2020.** A Deep-Learning-Based Real-Time  
686 Detector for Grape Leaf Diseases Using Improved Convolutional Neural Networks.  
687 *Frontiers in plant science* **11**: 751.
- 688 **Xu Z-S, Yang Q-Q, Feng K, Yu X, Xiong A-S. 2020.** DcMYB113, a root-specific R2R3-  
689 MYB, conditions anthocyanin biosynthesis and modification in carrot. *Plant*  
690 *biotechnology journal* **18**: 1585–1597.

- 691 **Yamagishi M, Shimoyamada Y, Nakatsuka T, Masuda K. 2010.** Two R2R3-MYB  
692 Genes, Homologs of Petunia AN2, Regulate Anthocyanin Biosyntheses in Flower  
693 Tepals, Tepal Spots and Leaves of Asiatic Hybrid Lily. *Plant and Cell Physiology* **51**:  
694 463–474.
- 695 **Yan S, Chen N, Huang Z, Li D, Zhi J, Yu B, Liu X, Cao B, Qiu Z. 2020.** Anthocyanin  
696 Fruit encodes an R2R3-MYB transcription factor, SIAN2-like, activating the transcription  
697 of SIMYBATV to fine-tune anthocyanin content in tomato fruit. *The New phytologist* **225**:  
698 2048–2063.
- 699 **York LM. 2019.** Functional phenomics: an emerging field integrating high-throughput  
700 phenotyping, physiology, and bioinformatics. *Journal of experimental botany* **70**: 379–  
701 386.
- 702 **Yu X, Qin Q, Wu X, Li D, Yang S. 2020.** Genetic and Physical Localization of the Gene  
703 Controlling Leaf Pigmentation Pattern in *Medicago truncatula*. *G3* **10**: 4159–4165.
- 704 **Zheng X, Om K, Stanton KA, Thomas D, Cheng PA. 2020.** MYB5a/NEGAN activates  
705 petal anthocyanin pigmentation and shapes the MBW regulatory network in *Mimulus*  
706 *luteus* var. *variegatus*. *bioRxiv*.

707

## 708 **Figures and legends**

709

710 **Figure 1: Experimental design, high throughput sampling, and color analysis.** (A)  
711 133 field-grown parents were randomly mated by pollinators, seeds were collected from  
712 each maternal plant, sown in progeny family blocks and grown for 5-6 weeks in a  
713 greenhouse; (B) One fully-expanded leaf was harvested and scanned from each plant in  
714 the population; (C) Color thresholding was used to isolate binary masks for each leaf.  
715 Discrete RGB color matrices were converted to the continuous Lab color space, and  
716 color matrices for each leaf were spatially separated into segments: “full” – defined as  
717 the entire color matrix, “border” – defined as the outer 15% of pixels from the leaf  
718 boundary to the centroid, and “center” – defined as the inner 75% of pixels from the  
719 centroid to the boundary. A Gaussian density estimator was used to extract quantitative  
720 pigmentation data (only 2D Gaussian density estimator was shown for visualization).

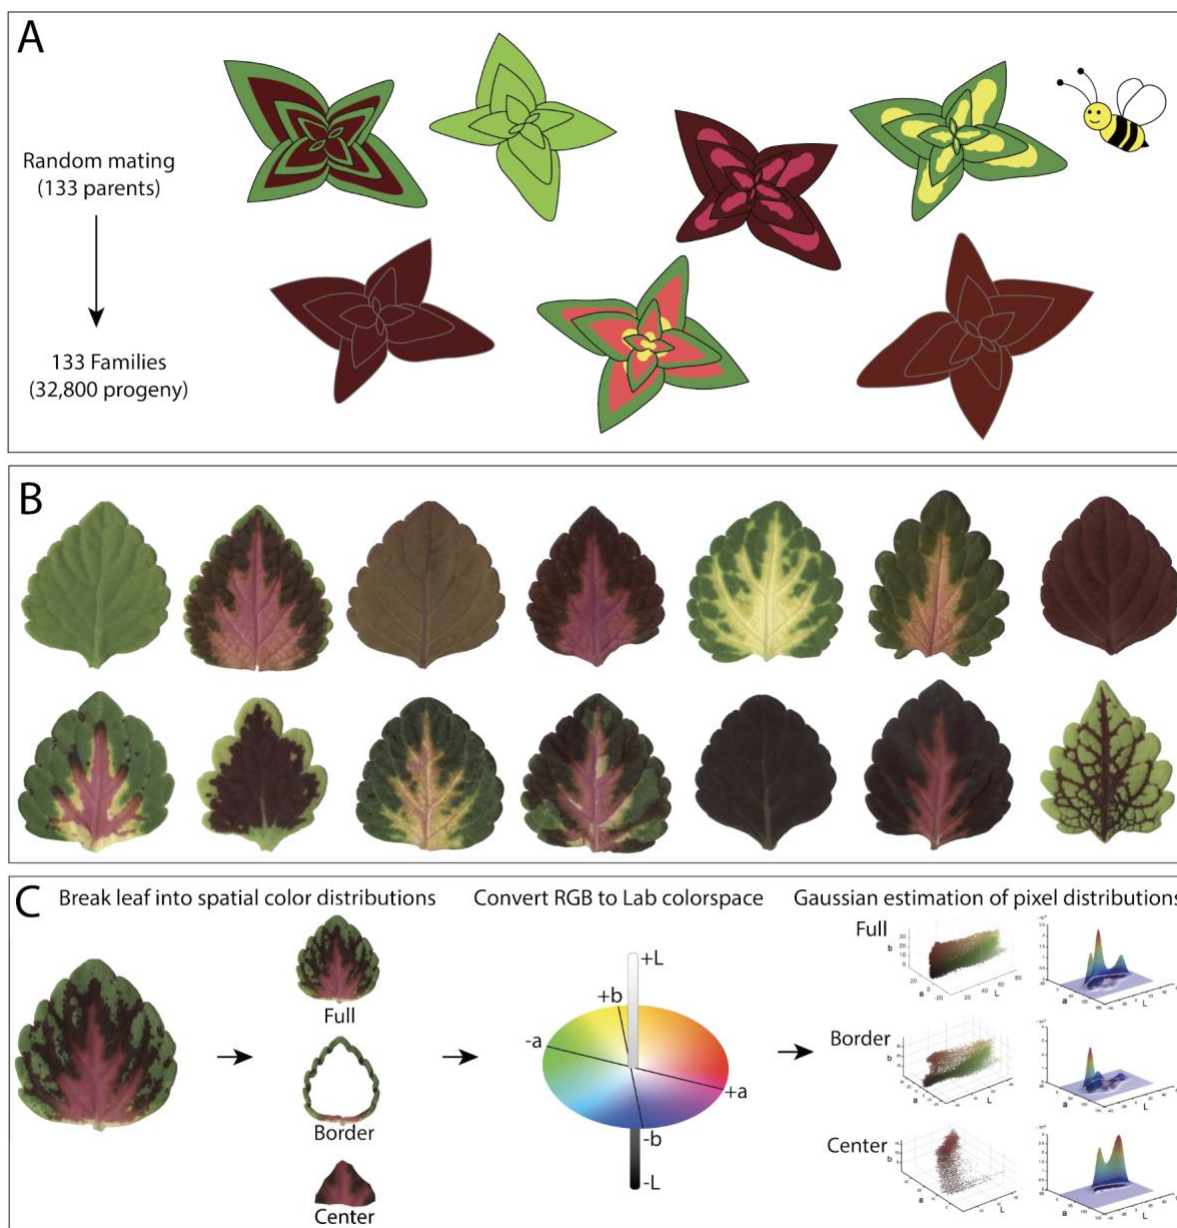

721  
722  
723  
724  
725 **Figure 2: CIELAB (L\*a\*b\*) color distribution.** (A) The histogram of mean L (lightness)  
726 values of the studied coleus population. The color for each bar corresponds to the Lab  
727 color with L value at x axis, a=0 and b=0; (B) Histogram of mean a (green to magenta)  
728 values. The color for each bar corresponds to the Lab color with a value at x axis, L=50  
729 and b=0; (C) Histogram of mean b (blue to yellow) values. The color for each bar  
730 corresponds to the Lab color with b value at x axis, L=50 and a=0; (D) Boxplot of the  
731 variance of L, a, and b for full leaf, border, and center. The “+” signs mark outliers that  
732 are more than 1.5 interquartile ranges above the upper quartile or below the lower  
733 quartile for each box, the central line indicates the median, top and bottom edges of the

734 box indicate 25th and 75th percentiles. Whiskers extend to the most extreme non-  
735 outliers of the data. P-values for full leaf versus border, full leaf versus center are also  
736 shown using paired sample t-test; **(E)** and **(G)** Multidimensional scaling (MDS) plot  
737 (MDS1 vs MDS2 in (E) and MDS3 vs MDS4 in (G)) for the pattern difference defined by  
738 the difference of Gaussian density estimator in 3D Lab colorspace across full leaf,  
739 border and center; **(F)** and **(H)** The same MDS plots shown in (E) and (G) but with  
740 example leaves superimposed to provide visual examples of the data distribution.  
741



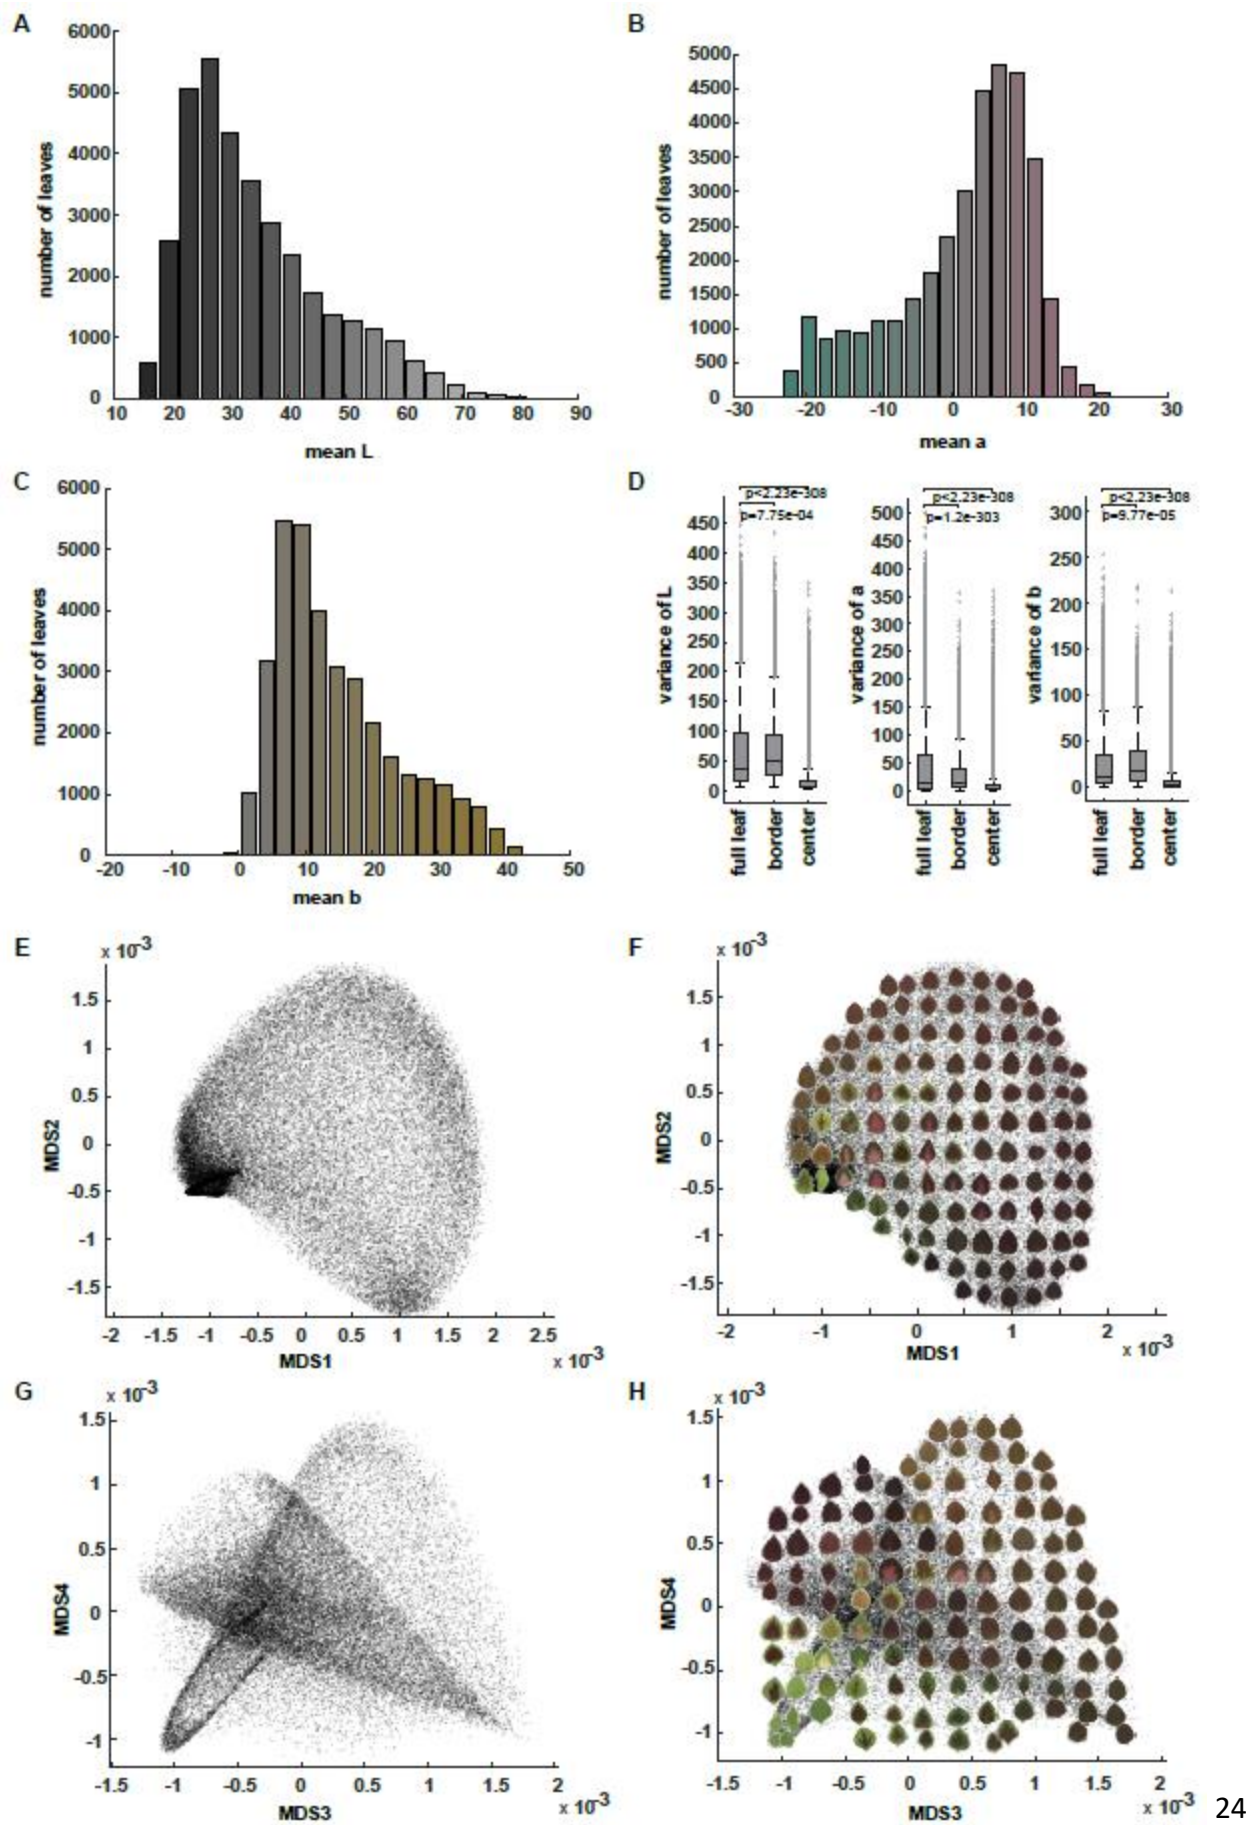

743  
744 **Figure 3: Maternal Plant-Progeny relationships.** On the left panel, each bar shows  
745 the average distance from maternal plants to progeny divided by the average distance  
746 from maternal plants to all leaves (x-axis) for each progeny family (y-axis)  
747 superimposed upon the scan of the maternal plant. On the right panels, there are six  
748 MDS plots (MDS1 vs MDS2) from six progeny families as examples with different colors  
749 correspond to the families highlighted in the same colored rectangles on the left panel.  
750 On each MDS plot, grey dots show all leaves, colored stars represent the maternal  
751 plants, and colored dots are the progeny.

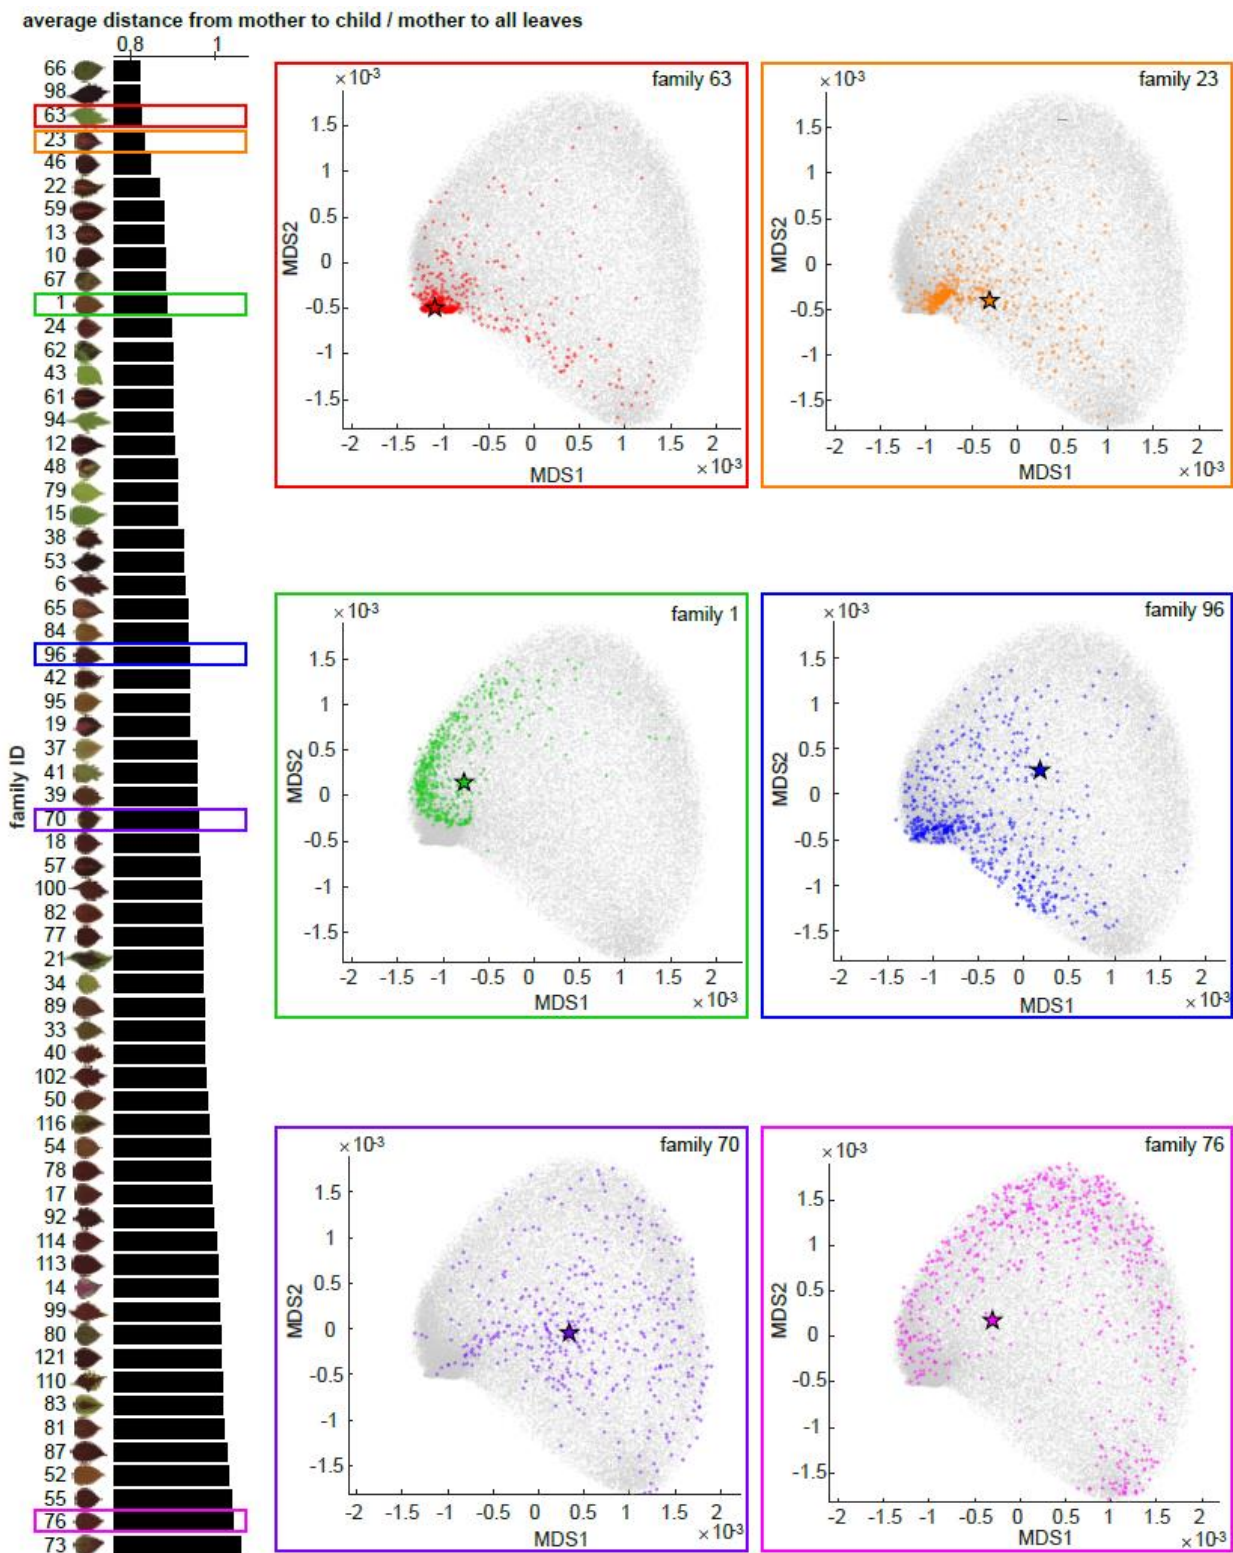

752  
753  
754  
755  
756

757 **Figure 4: Influence of color and shape on cultivar selection.**

758 **(A)** Mirror symmetry of color: Partitioning of each leaf into left and right halves (top  
759 panel), convert each part into 3D point cloud in Lab color space (middle panel), and  
760 calculate the 3D Gaussian density estimator (lower panel, only shows 2D Gaussian  
761 density estimator for visualization); **(B)** Mirror symmetry of shape: flip the leaf  
762 horizontally (top panel), measure the non-overlapped area (lower panel) and calculate  
763 the percentage of non-overlapped area over the leaf area; **(C)** Distribution of degree of  
764 color asymmetry (top panel) and shape asymmetry (bottom panel) for entire population  
765 (in black) and selected population (in red); **(D)** Distribution of mean L (top left), mean a  
766 (top middle), mean b (top right), variance of L (bottom left), variance of a (bottom  
767 middle), and variance of b (bottom right) for entire population (in black) and selected  
768 population (in red). Significance was measured using a two sample t-test for uneven  
769 sample sizes.

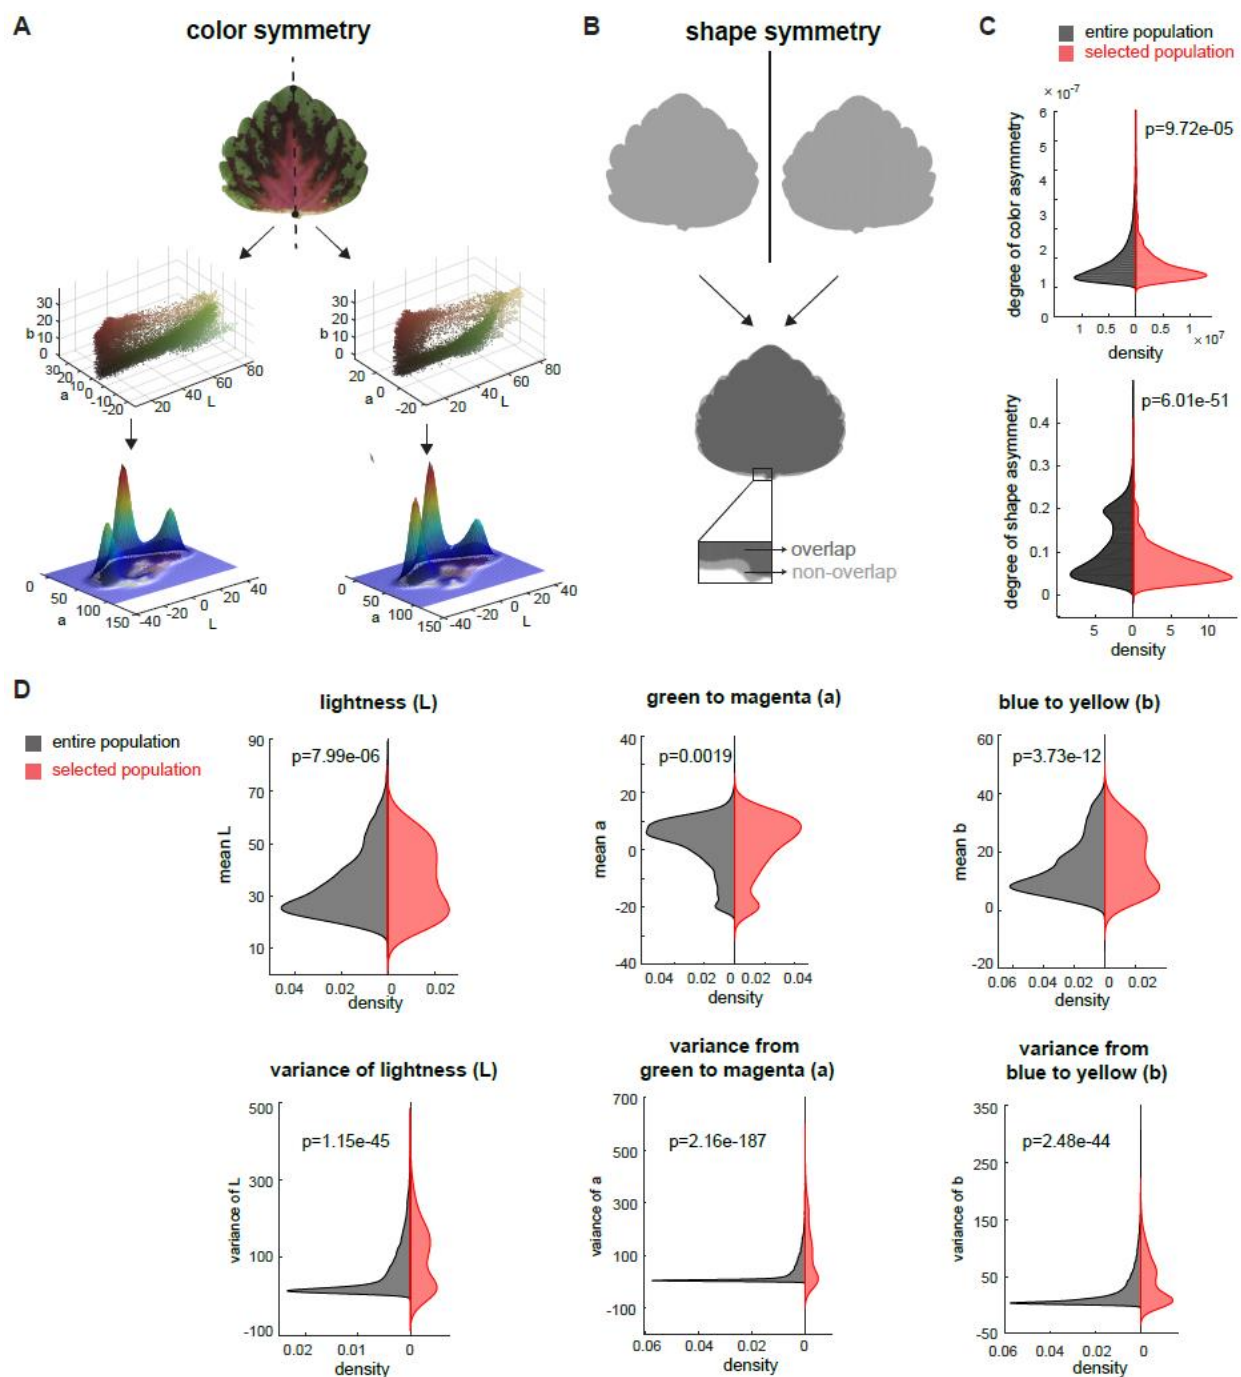

770  
 771  
 772  
 773  
 774  
 775  
 776  
 777  
 778  
 779

780 **Figure 5: Public survey for color preferences using shape-transformed leaves. (A)**  
781 Deform each leaflet into a disk by thin plate spline interpolation – non-linear deformation  
782 into a unit circle; **(B)** and **(C)** Principal component analysis plot superimposed upon  
783 some example of leaves (PC1 vs PC2 in (B) and PC3 vs PC4 in (C)) for the pixel Lab  
784 values of deformed leaflet; **(D)** Eigencolors for the first eight PCs and the percentage of  
785 variance they explained. For PC k, the eigencolor at -x SD and +x SD along PC axis are  
786 shown, where  $x=3+(k-1)*0.5$  for better visualization; **(E)** Survey logo (top left) and the  
787 survey result from 172 responses; **(F)** Reconstructed pattern (top) and closest real leaf  
788 (bottom) from first eight eigencolors with weights guided by the survey response  
789 proportion.  
790

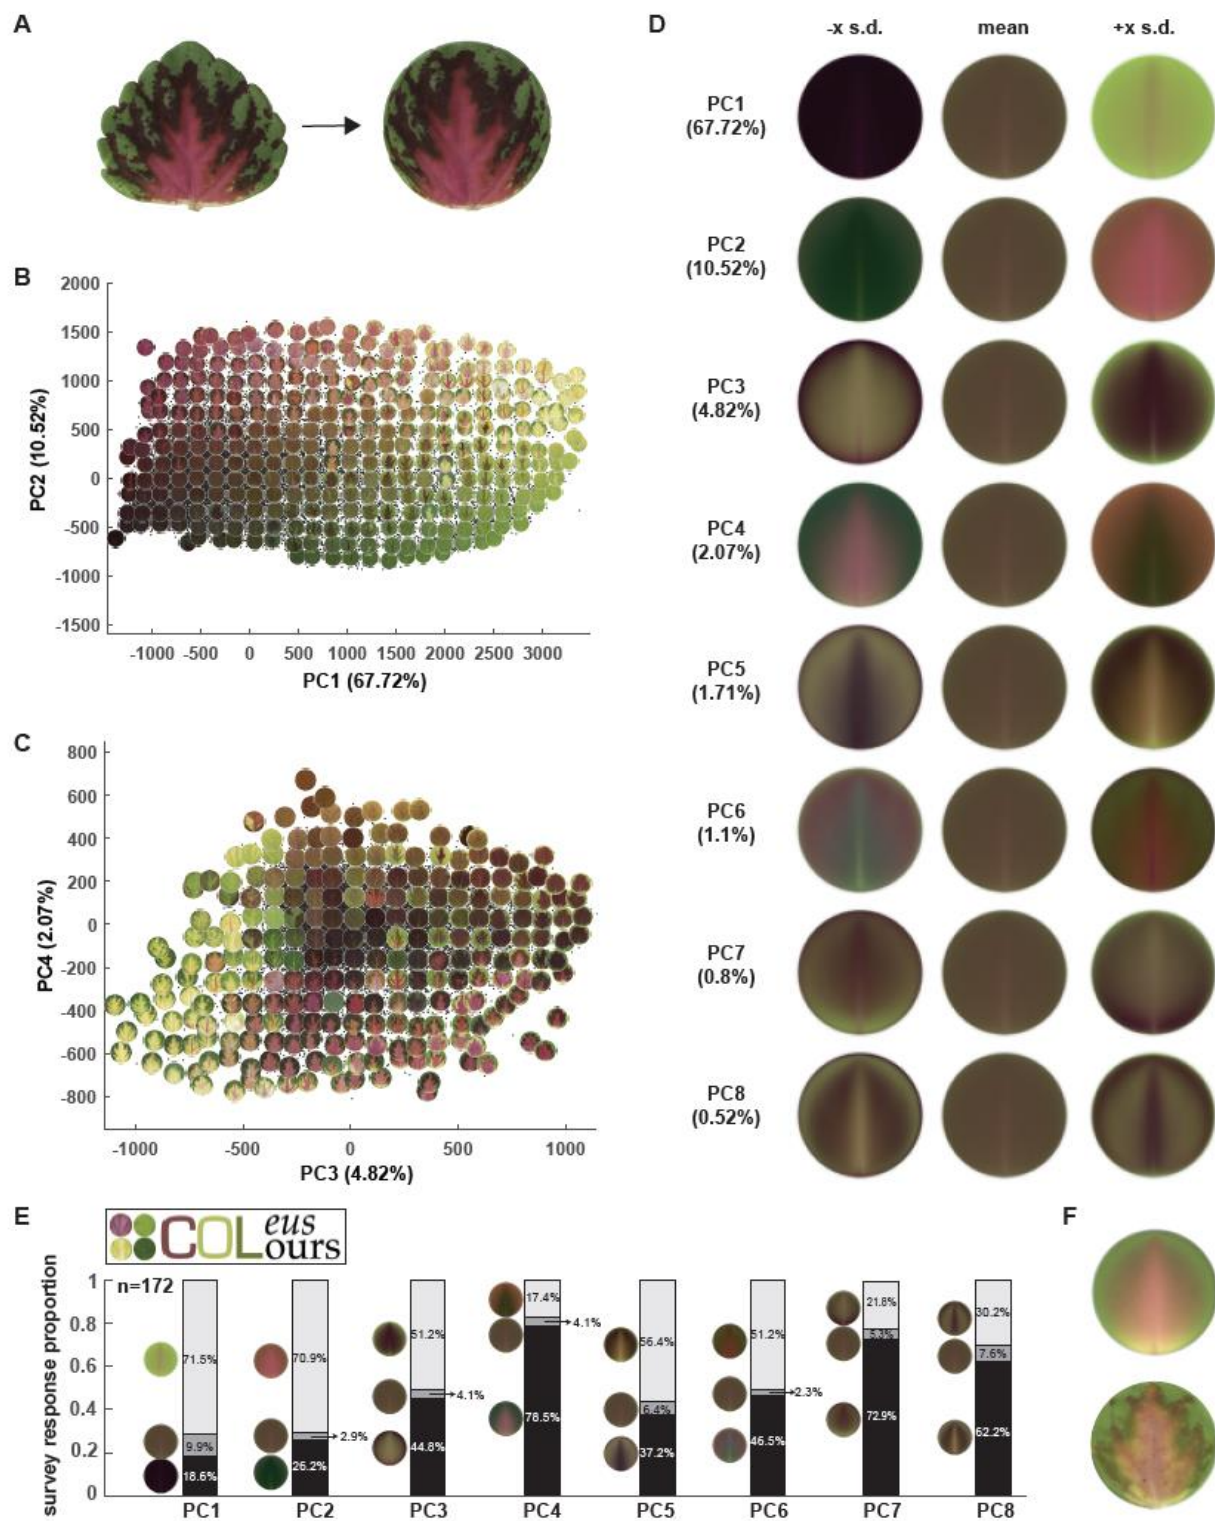

791  
792  
793  
794  
795  
796

Supplemental Figures

797 **Figure S1: Data collection. (A)** Data were collected for one leaf from the first fully  
798 expanded leaf pair. **(B)** Leaves were imaged on a flatbed scanner with a color card for  
799 color correction and a ruler.  
800

A - leaf selection

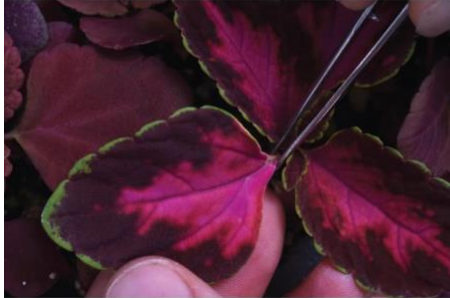

B - leaf scanning

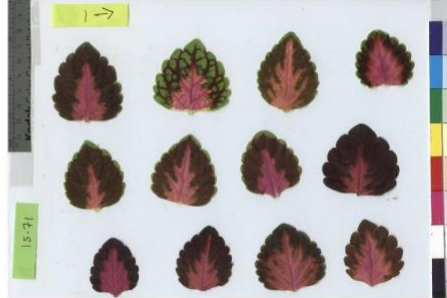

801  
802  
803  
804  
805  
806  
807  
808  
809  
810  
811  
812  
813

**Figure S2: Color distribution for mean L and mean a.** Plot of mean L (x-axis) and a  
(y-axis) for the full coleus population with point density (A) and example leaves overlaid  
on top of points (B).

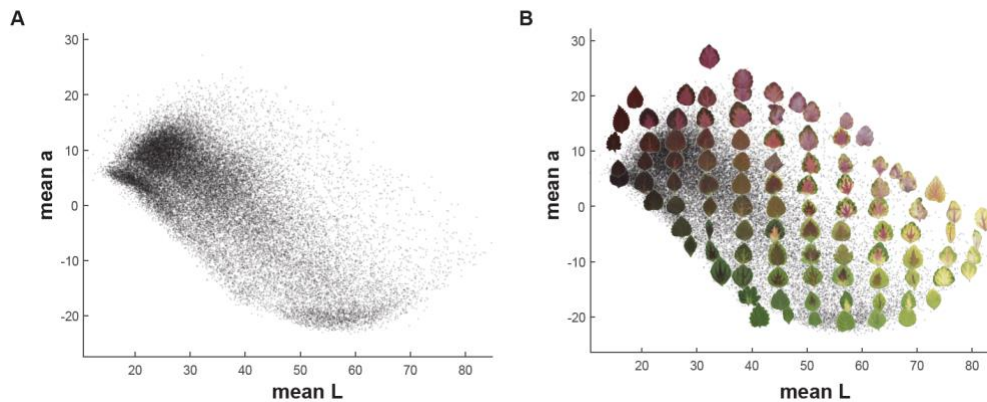

814  
815  
816  
817  
818  
819  
820  
821  
822  
823  
824



825  
826  
827  
828  
829  
830  
831  
832  
833  
834

**Figure S3: Principal Component Analysis for color in the entire coleus population using segmented or full leaf data sampling.** PCA plots for Lab Gaussian density of color distribution with example leaves overlaid on top of data points for the full leaf (A), leaf border (B), and leaf center (C).

**A: Lab Gaussian density color distribution for full leaf**

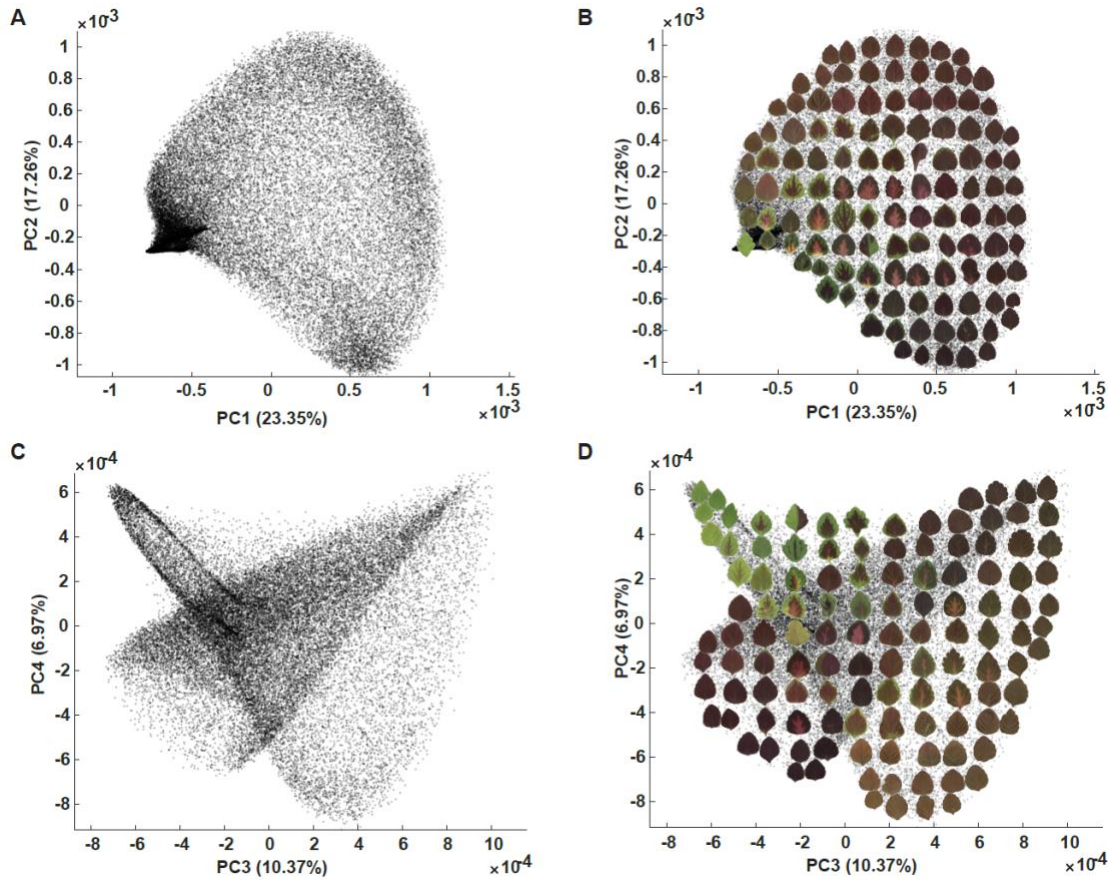

835  
836  
837  
838  
839  
840  
841  
842  
843  
844  
845  
846  
847

**B: Lab Gaussian density color distribution for leaf border**

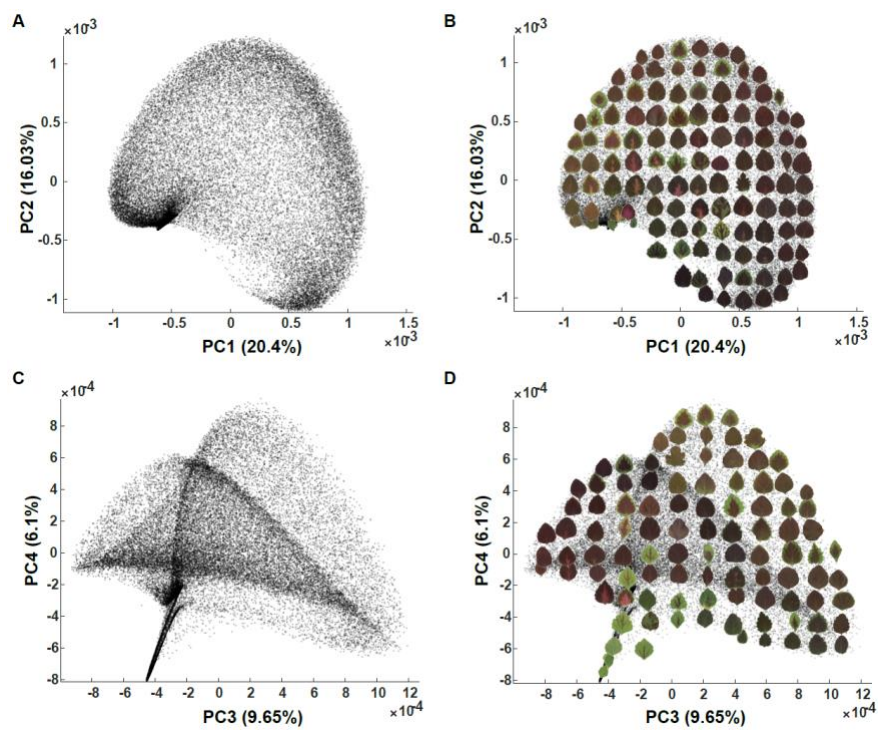

848  
849  
850  
851  
852  
853  
854  
855  
856

**C: Lab Gaussian density color distribution for center**

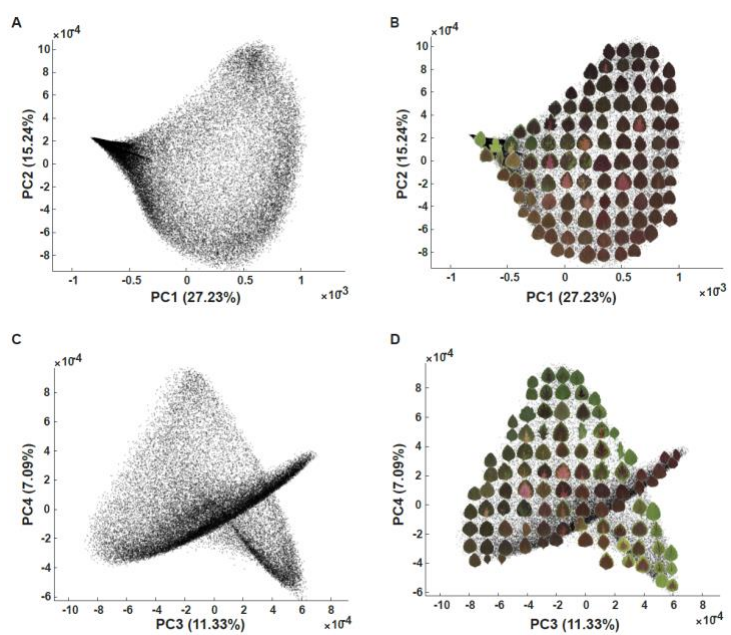

857  
858  
859

860 **Figure S4: Maternal Plant-Progeny relationships based on mean and variance of**  
861 **Lab color.** Scatter plots with x-axis represents the mean L (A), mean a (B), and mean b  
862 (C) of maternal plant and y-axis represents the variance of the corresponding mean  
863 value of the progeny, respectively; Scatter plots with x-axis represents the variance of L  
864 (D), variance of a (E), and variance of b (F) of maternal plant and y-axis represents the  
865 variance of the corresponding variance value of the progeny, respectively.

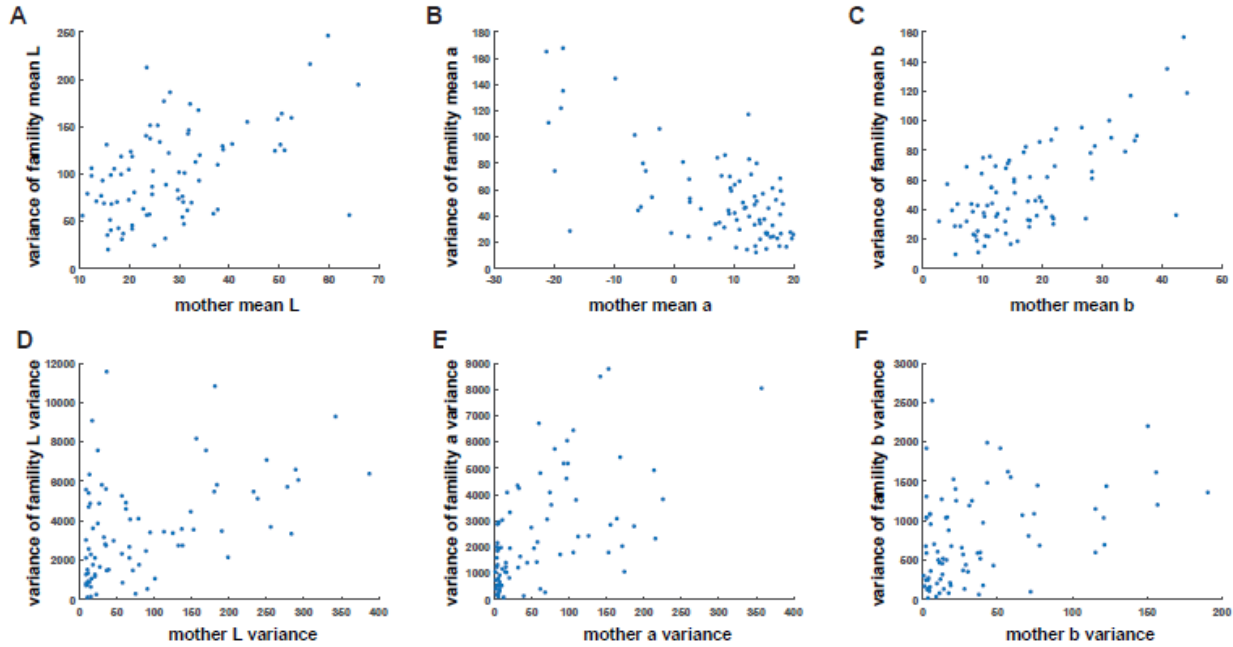

866  
867  
868  
869  
870  
871  
872
